# Supplementary material
Source: PubMed Central journal article supplement (PMC6810757)
Supplement: NIHMS1037790-supplement-supp_info.pdf [file NIHMS1037790-supplement-supp_info.pdf]

## Supplementary Materials

### Functional Interrogation of Lynch Syndrome Associated *MSH2* Missense Variants via CRISPR-Cas9 Gene Editing in Human Embryonic Stem Cells

Abhijit Rath<sup>1</sup>, Akriti Mishra<sup>2</sup>, Victoria Duque Ferreira<sup>3</sup>, Chaoran Hu<sup>4,5</sup>, Gregory Omerza<sup>6</sup>, Kevin Kelly<sup>6</sup>, Andrew Hesse<sup>6</sup>, Honey V. Reddi<sup>6</sup>, James P. Grady<sup>5</sup>, Christopher D. Heinen<sup>1</sup>

<sup>1</sup> Center for Molecular Oncology and Institute for Systems Genomics, UConn Health, Farmington, CT 06030-3101, USA

<sup>2</sup> Department of Molecular and Cell Biology, University of Connecticut, Storrs, CT 06269, USA

<sup>3</sup> University of St. Joseph, West Hartford, CT 06117, USA

<sup>4</sup> Department of Statistics, University of Connecticut, Storrs, CT 06269, USA

<sup>5</sup> Connecticut Institute for Clinical and Translational Science, UConn Health, Farmington, CT 06030, USA

<sup>6</sup> Clinical Genomics Laboratory, The Jackson Laboratory for Genomic Medicine, Farmington, CT 06032, USA

Corresponding Author: Christopher D. Heinen, 263 Farmington Avenue, Farmington, CT 06030-3101, Phone: 860-679-8859, Email: cheinen@uchc.edu

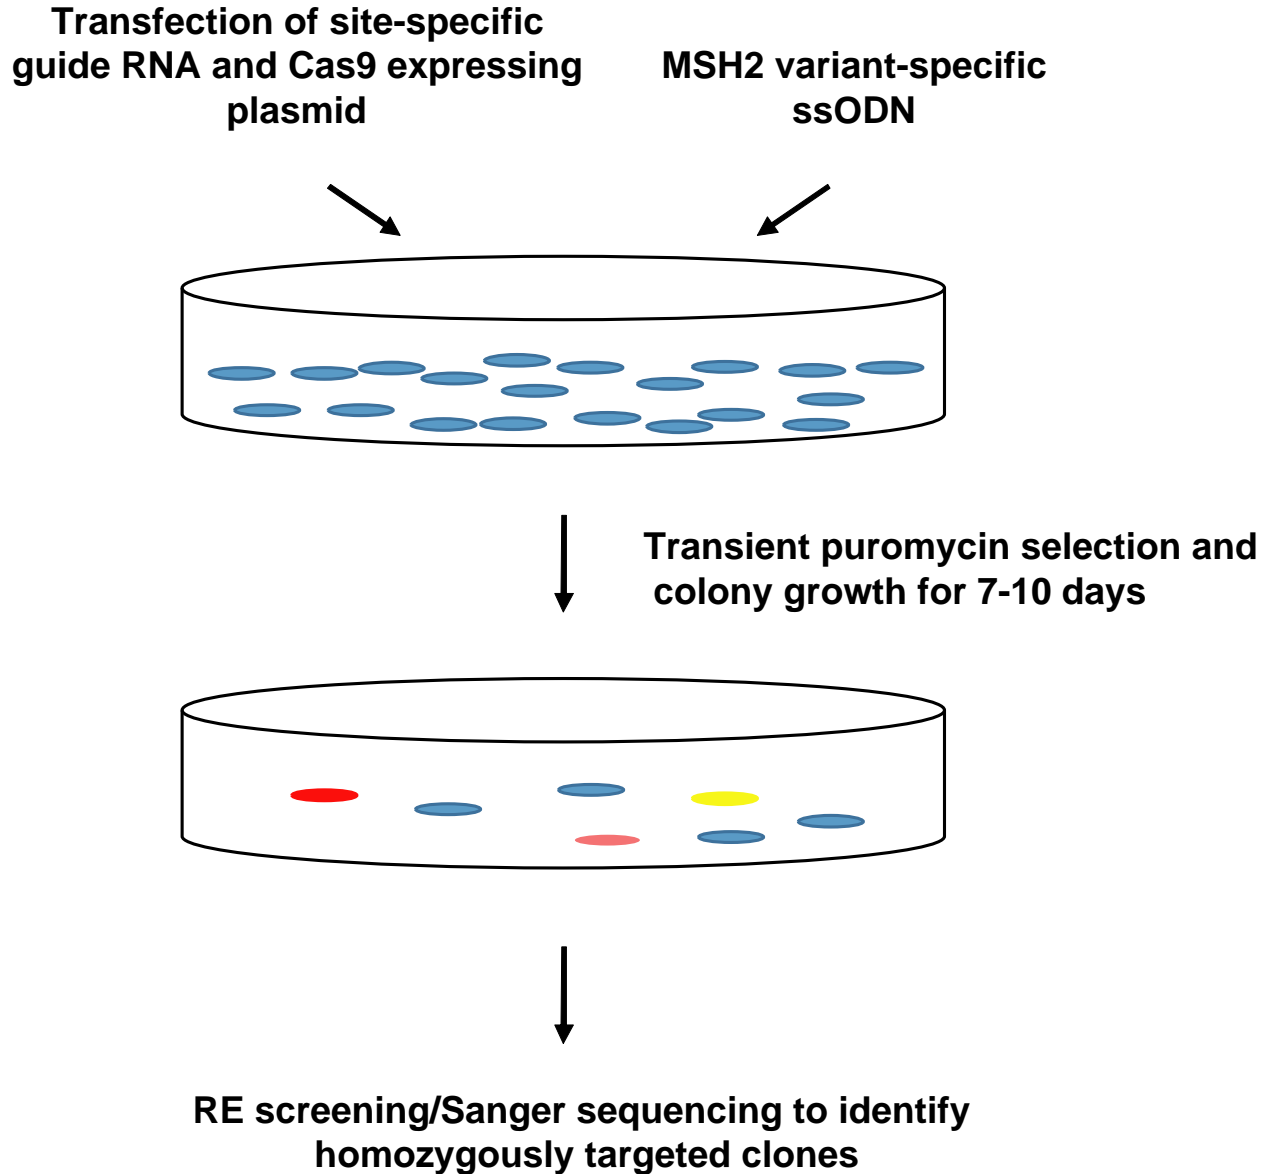

**Figure S1.** Outline of CRISPR-Cas9 gene editing process. Schematic showing the general framework of the CRISPR-Cas9 gene targeting process to generate clonal homozygous *MSH2* variant lines in H1 hESCs. H1 WT cells are indicated in blue. All other colors demonstrate the clonal heterogeneity in the cell population obtained after targeting.



### Class 1

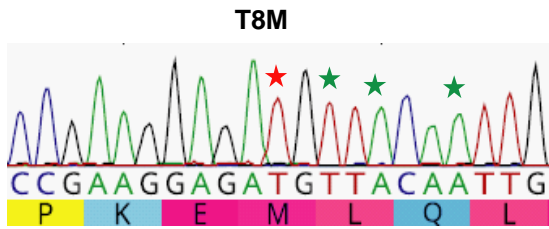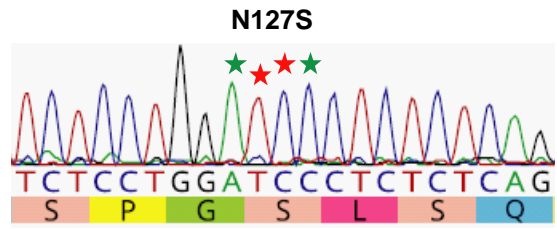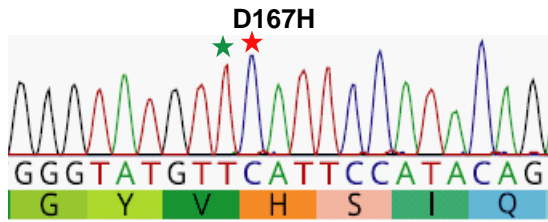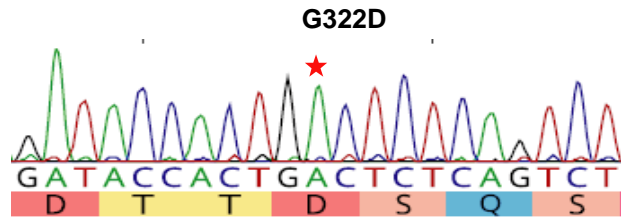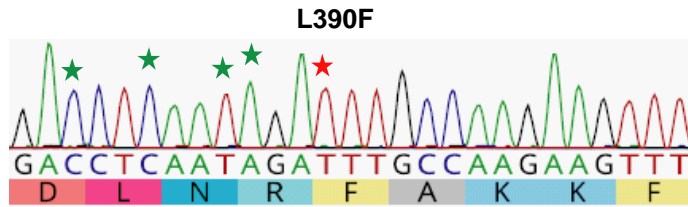

### Class 5

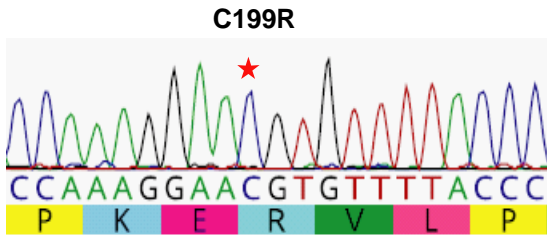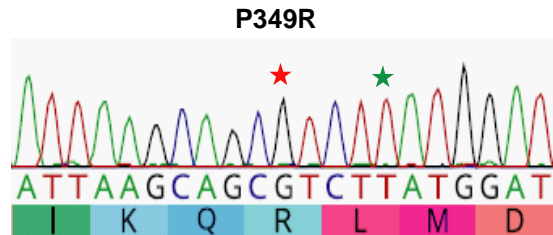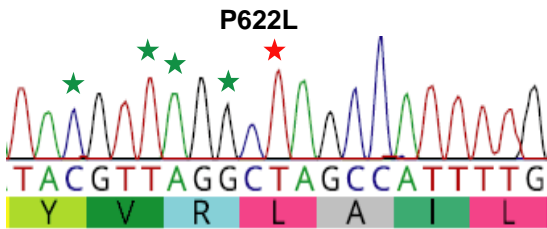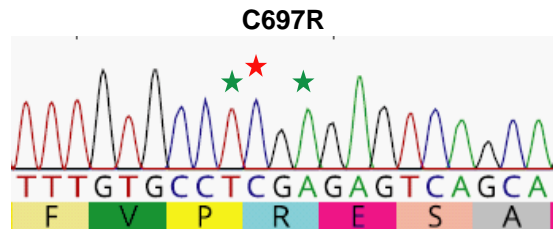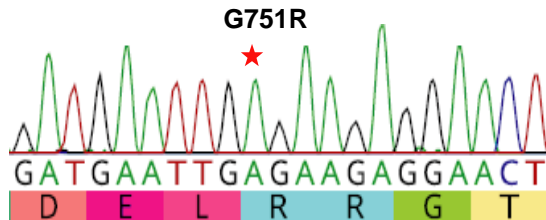

### Class 3

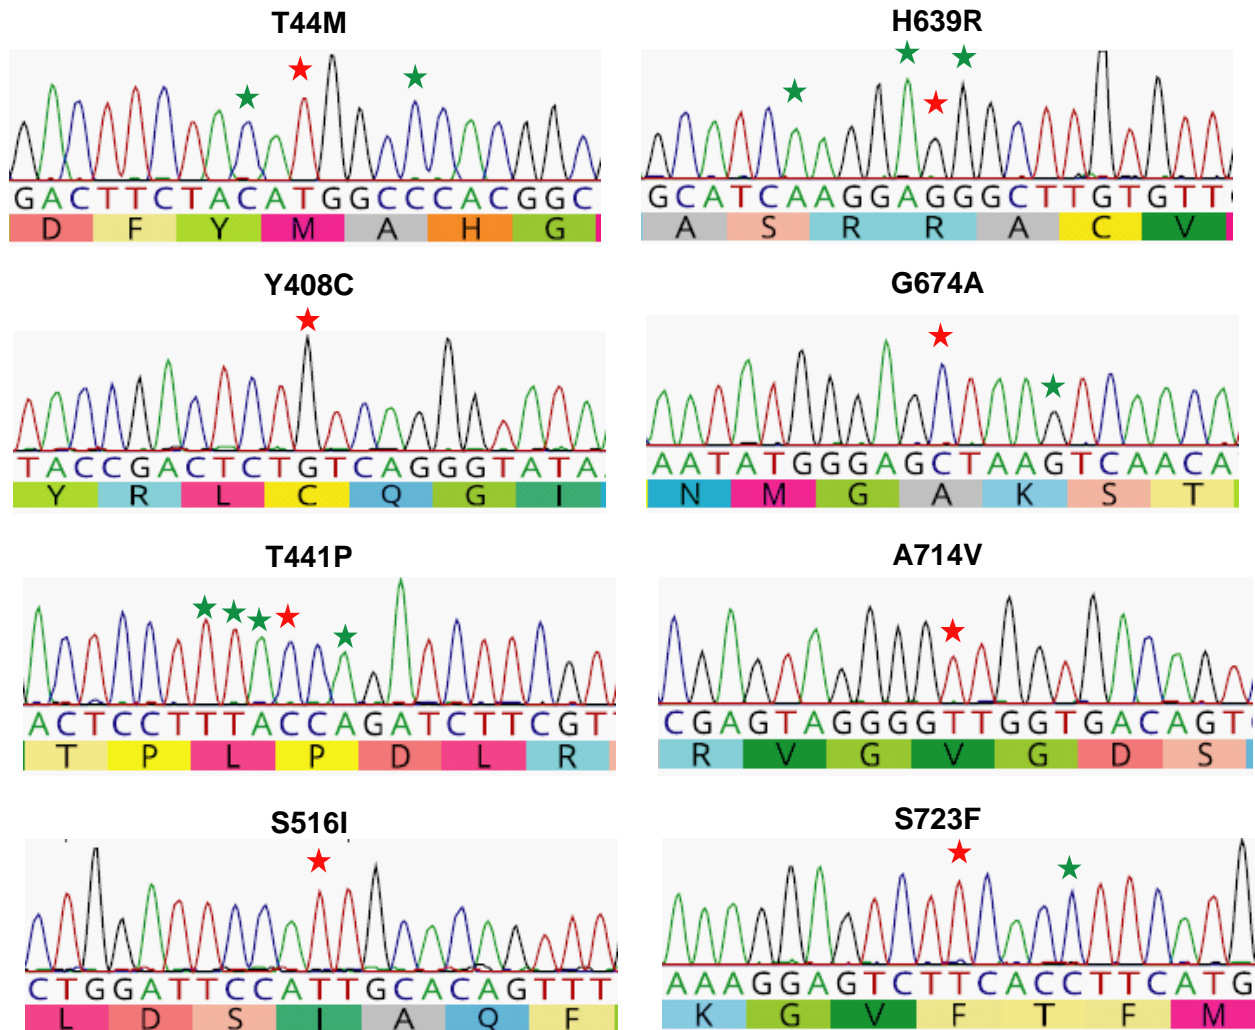

**Figure S3.** Sanger sequencing results of the targeted region in the homozygous *MSH2* variant expressing cell lines. Images display DNA chromatograms for each generated cell line showing homozygous insertion of the codon-altering mutations (red stars) and silent mutations (green stars).

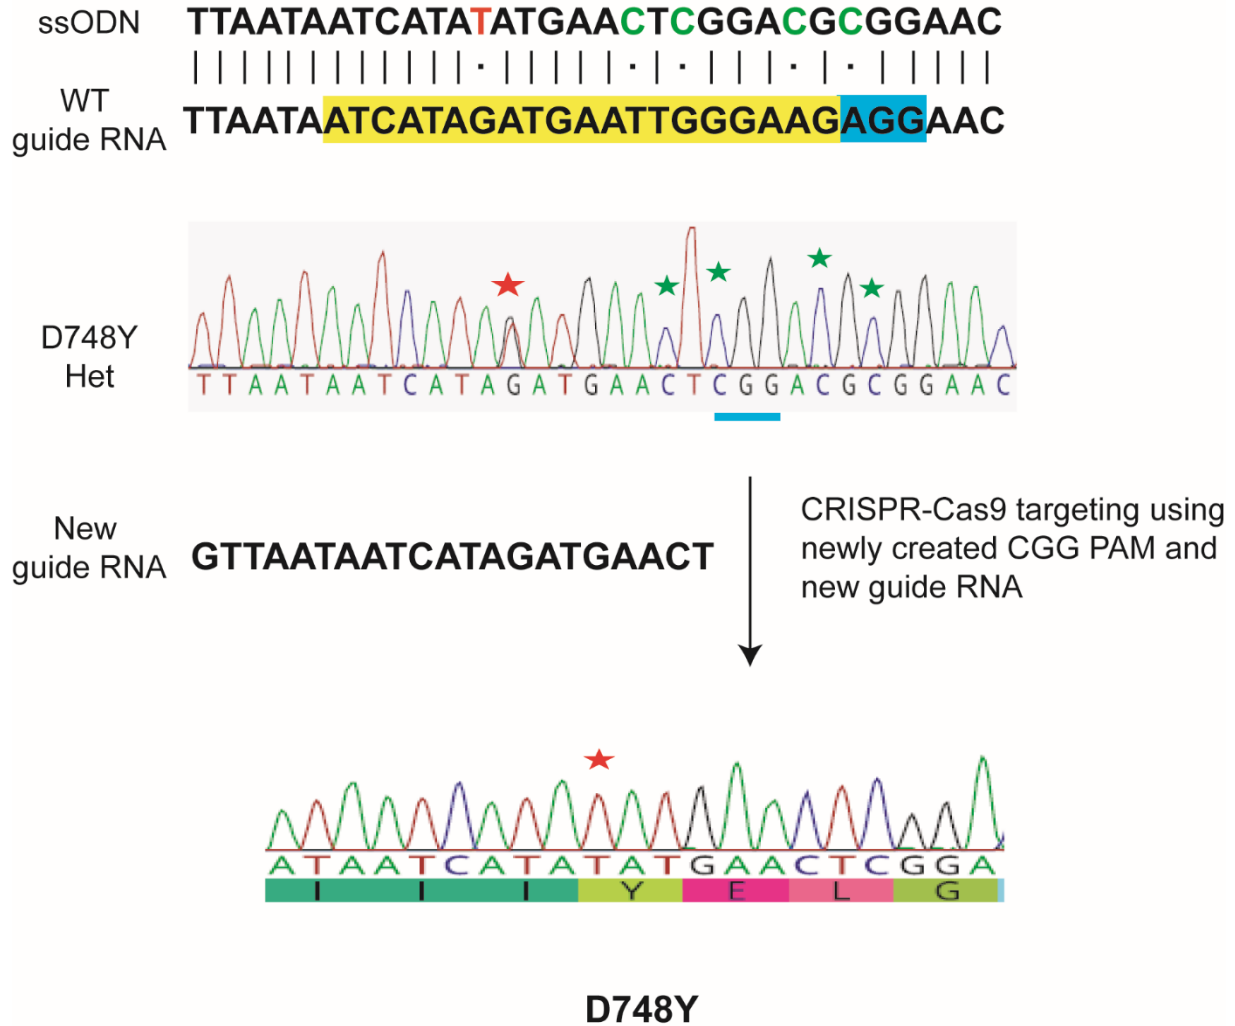

**Figure S4.** Generation of p.D748Y homozygous cell line from a p.D748Y heterozygous line. The schematic shows the WT genomic DNA (gDNA) sequence and the ssODN originally used to generate p.D748Y using the “AGG” PAM (light blue) and guide RNA sequence (yellow) in our first attempt. The solid vertical bars (|) represent matching ssODN sequence with the WT gDNA, whereas the dots (.) represent mismatches. The codon-altering mutation is shown in red and the silent mutations are shown in green. Initial targeting resulted in p.D748Y heterozygous (D748Y Het) line with incorporation of all the silent mutations in homozygous fashion essentially creating a new guide RNA binding site. The use of “GGG” PAM in the WT sequence was not possible during the initial round of targeting because of the presence of an identical sequence at another genomic locus. The p.D748Y Het line was subsequently re-targeted using the new guide RNA and PAM sequence (CGG, underlined with blue bar) displayed here to generate p.D748Y expressing cells. The silent mutations in the final p.D748Y line are not shown for clarity.

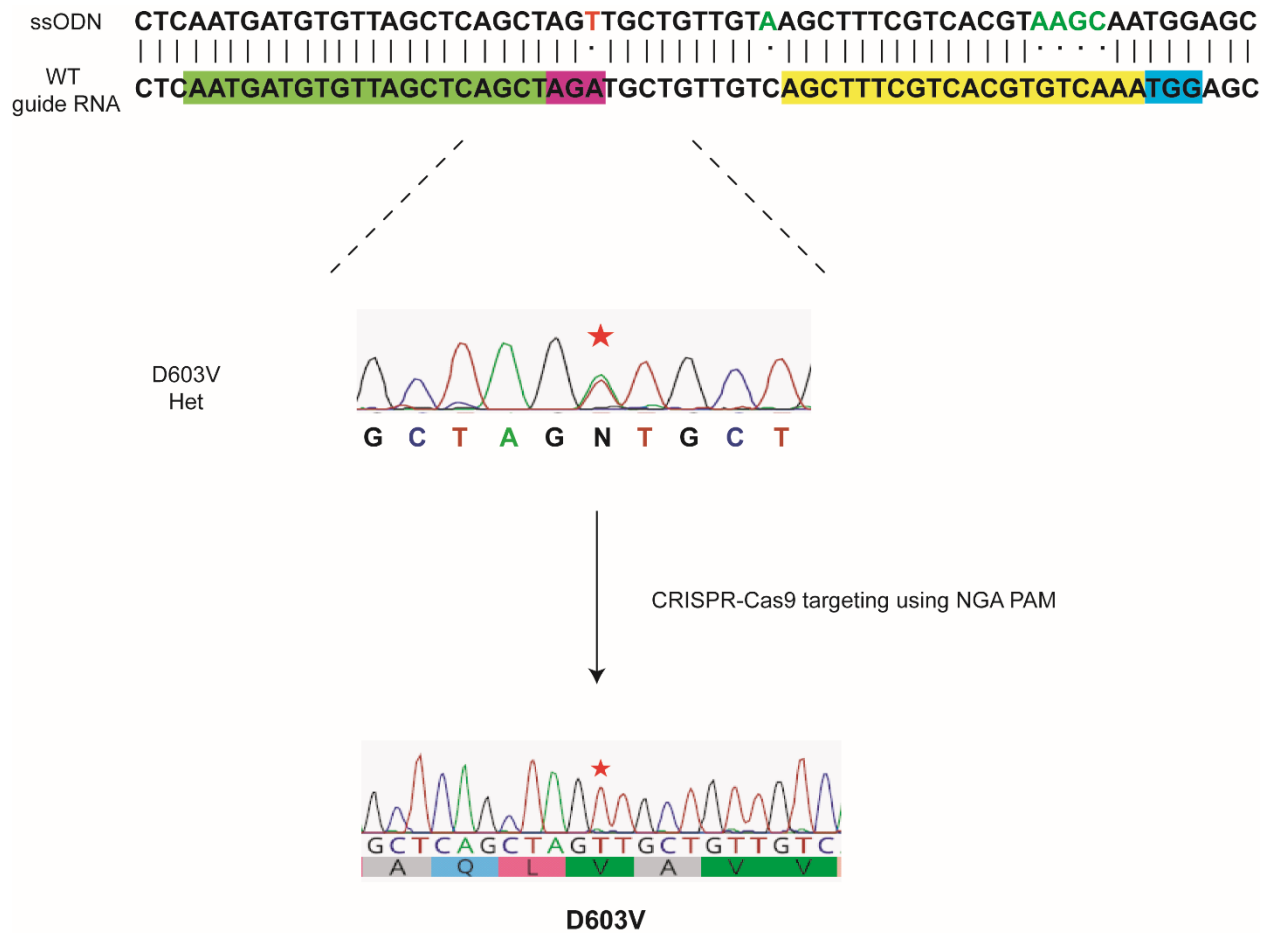

**Figure S5.** Generation of p.D603V cell line. Upon failure to generate p.D603V using “TGG” PAM (light blue) and the corresponding guide RNA (yellow), we switched to “AGA” PAM (magenta) and the appropriate guide RNA (green) for our second attempt. A p.D603V heterozygous (D603V Het) clone was obtained which was subsequently re-targeted to generate p.D603V-expressing cells.

| Cell Lines         | ClinVar ID                                                                                                                             | Mutation in cDNA  | Genomic DNA sequence for sgRNA |
|--------------------|----------------------------------------------------------------------------------------------------------------------------------------|-------------------|--------------------------------|
| <b>Class 1</b>     |                                                                                                                                        |                   |                                |
| T8M                | 90964                                                                                                                                  | c.23C>T           | <b>GGCCGAAGGAGACGCTGCAGT</b>   |
| ssODN              | GCGCACGAAGCCGACCTCGGCCGCGCTCTCCAA <b>TTGTAAC</b> ATCTCTTCGGCTGCACCGCCATGTGCAAACCTCCTCACCTCCTGGTTGA (antisense)                         |                   |                                |
| N127S              | 36577                                                                                                                                  | c.381_382delinsTC | <b>GTCAA</b> ACTGAGAGAGATTGCC  |
| ssODN              | ATTTTTAAAAATTTTATTTTACTTAGGCTTCTCCTGG <b>ATCC</b> CTCTCAGTTTGAAGACATTCTCTTTGGTAACAATGATATGTCAGCTTCCATTGGTG (sense)                     |                   |                                |
| D167H              | 91112                                                                                                                                  | c.499G>C          | <b>GACAGGTTGGAGTTGGGTATG</b>   |
| ssODN              | ACACAGTCCTAGTTTCTGTATGGAAT <b>G</b> AACATACCCAACCTCAACCTGTCTCTGGCCATCAACTGCGGACATTTAACACCCACAAC (antisense)                            |                   |                                |
| G322D              | 1762                                                                                                                                   | c.965G>A          | <b>GGTTCTGTTGAAGATACCAC</b>    |
| ssODN              | TATTTTTGTTTACTAGGGTTCTGTTGAAGATACC <b>ACTG</b> ACTCTCAGTCTCTGGCTGCCTTGCTGAATAAGTGTA <b>AAACC</b> (sense)                               |                   |                                |
| L390F              | 41641                                                                                                                                  | c.1168C>T         | <b>GTTGGCAAGTCGGTTAAGATCT</b>  |
| ssODN              | ACTTTACAAGAAGATTACTTCGTCGATTCC <b>CAGACCTCA</b> ATAGATTTGCCAAGAAGTTTCAAAGACAAGCAGCAA <b>ACTTACA</b> AGATTGT (sense)                    |                   |                                |
| <b>Class 3</b>     |                                                                                                                                        |                   |                                |
| T44M               | 90627                                                                                                                                  | c.131C>T          | <b>GGCGACTTCTATACGGCGCA</b>    |
| ssODN              | CCGGGCGGCCAGCAGCGCGTCTCGCCGT <b>GGGCCATG</b> TAGAAGTCGCCCGGTGCAAAAGGCCACTGTGGTGGTCGGCTTCTCCGGCAT (antisense)                           |                   |                                |
| Y408C              | 90574                                                                                                                                  | c.1223A>G         | <b>GAGATTGTTACCGACTCTATC</b>   |
| ssODN              | CTGTATAACATTAGGTAGTTGATTTATACCCTG <b>AC</b> AGAGTCGGTAACAATCTTGTAAGTTTGCTGCTTGTCTTTGAAACTTCTTGGCAAG (antisense)                        |                   |                                |
| T441P              | 90628                                                                                                                                  | c.1321A>C         | <b>GTCAGAACGAAGATCAGTAAG</b>   |
| ssODN              | TATTGTTGGCAGTTTTTGACTCCT <b>TTACC</b> AGATCTTCGTTCTGACTTCTCCAAGTTTCAGGAAATGATAGAAACA <b>ACTTTAG</b> ATATGG (sense)                     |                   |                                |
| S516I              | 90694                                                                                                                                  | c.1547G>T         | <b>GTAATATCCAAACTGTGCAC</b>    |
| ssODN              | GGACCCTGGCAAACAGATTA <b>AACTGG</b> ATTCCA <b>ATTG</b> CACAGTTTGATATTACTTTCTGTGAACCTGTAAGGAAGAAAAAGTCTTCGTAA (sense)                    |                   |                                |
| D603V              | 480909                                                                                                                                 | c.1808A>T         | <b>GAATGATGTGTTAGCTCAGCT</b>   |
| ssODN              | TTGACACGTGAGCAAAGCTGACAACAGCA <b>ACTAG</b> CTGAGCTAACACATCATTGAGTGTCTGCATTGGTTCTACATAGCCTGTATA <b>AAAAAT</b> (antisense)               |                   |                                |
| H639R              | 90818                                                                                                                                  | c.1916A>G         | <b>GA</b> ACTTCAACACAAGCATGCC  |
| ssODN              | ACAAGGAAGAATTATATTA <b>AAAGCATCAAGGAGGG</b> CTTGTGTTGAAGTTCAAGATGAAATTGCATTTATCC <b>TAATGAC</b> GTATACTTTGA (sense)                    |                   |                                |
| G674A              | NA                                                                                                                                     | c.2021G>C         | <b>GTTTGTAGGCCCCCAATATGGG</b>  |
| ssODN              | CCCAGTTTGTCGAATATATGTTG <b>ACTTAG</b> CTCCCATATTGGGGCCTACAAAACAAATTATATCAGAAAGCAAGATTTTAACTTCTTTCT (antisense)                         |                   |                                |
| A714V              | 90907                                                                                                                                  | c.2141C>T         | <b>GATCTTAGCCCGAGTAGGGGC</b>   |
| ssODN              | ACGTGGAGACTCCTTTCAATTGACTGTCACCA <b>ACCCTACT</b> CGGGCTAAGATGCAGTCCACAATGGACACTTCTGCTGACTCACATGGCA (antisense)                         |                   |                                |
| S723F              | 90913                                                                                                                                  | c.2168C>T         | <b>GCAACATTTCAGCCATGAACG</b>   |
| ssODN              | GGGCTGGTGACAGTCAATTGAAAGGAGTCT <b>CACCT</b> TCATGGCTGAAATGTTGGAACTGCTTCTATCCTCAGGTAAGTGCATCTCCTAGTC (sense)                            |                   |                                |
| D748Y              | 90941                                                                                                                                  | c.2242G>T         | <b>GTTTGTAGGCCCCCAATATGGG</b>  |
| ssODN              | AACCCAAATCCATCGTAGGTAGAAGTTCC <b>GGCTCCGAGTT</b> CATATATGATTATTAATGAATCTTTGGTTGCAGACCTGAAGCACATAATT (antisense)                        |                   |                                |
| D748Y <sup>a</sup> | 90941                                                                                                                                  | c.2242G>T         | <b>GTTAATAATCATAGATGAACT</b>   |
| ssODN              | GGGAAATTT <b>CATG</b> TAATTATGTCTTCAGGTCTGCAACCAAAGATTCATTAATAATCATA <b>TATGAGCT</b> CGGACCGGAACTTCTACCTACGATGGATTTGGGTTAGCATG (sense) |                   |                                |
| <b>Class 5</b>     |                                                                                                                                        |                   |                                |
| C199R              | 91146                                                                                                                                  | c.595T>C          | <b>GCCGGGTAAAACACATTTCCTT</b>  |
| ssODN              | ATCTTGAGGCTCTCCTCATCCAGATTGGACCAAAGGAA <b>CGT</b> GTTTTACCCGGAGGAGAGACTGCTGGAGACATGGGGAACTGAGACAGG (sense)                             |                   |                                |
| P349R              | 90513                                                                                                                                  | c.1046C>G         | <b>GATTCTGTTCTTATCCATGAG</b>   |
| ssODN              | AAAGACTTGTTAACCAAGTGGATTAAGCAG <b>CGTCT</b> TATGGATAAGAACAGAATAGAGGAGAGGTATGTTATTAGTTTATACTTTCGTTAGT (sense)                           |                   |                                |



|                       |                                                                                                                    |           |                               |
|-----------------------|--------------------------------------------------------------------------------------------------------------------|-----------|-------------------------------|
| P622L                 | 1753                                                                                                               | c.1865C>T | <b>G</b> AAAATGGCTGGTCGTACATA |
| ssODN                 | TTGCTCACGTGTCAAATGGAGCACCTGTTCCATACGTTAGGCTAGCCATTTTGGAGAAAGGACAAGGAAGATTATATTTAAAAGCATCCA (sense)                 |           |                               |
| C697R                 | 90882                                                                                                              | c.2089T>C | GACACTTCTGCTGACTCACA          |
| ssODN                 | TCGGGCTAAGATGCAGTCCACAATGGACACTTCTGCTGACTCT <b>C</b> <b>G</b> AGGCACAAAACACCCAATTTGGGCCATGAGTACTATCACCCAGT (sense) |           |                               |
| G751R                 | 90943                                                                                                              | c.2251G>A | <b>G</b> TTAATAATCATAGATGAATT |
| ssODN                 | CAAATCCATCGTAGGTAGAAGTTCCTCTTCT <b>T</b> CAATTCATCTATGATTATTAATGAATCTTTGGTTGCAGACCTGAAGCACATAATTACAT (antisense)   |           |                               |
| <i>Revertant Line</i> |                                                                                                                    |           |                               |
| I516S                 |                                                                                                                    | c.1547T>G | GTAATATCCAAACTGTGCAA          |
| ssODN                 | GGACCCTGGCAAACAGATTAAACTGGATTCCA <b>G</b> TGCACAGTTTGGATATTACTTTCGTGTAACCTGTAAGGAAGAAAAAGTCCTTCGTAA (sense)        |           |                               |

**Supp. Table S1** Sequence Details for Single Guide RNAs and ssODNs Used for Gene Editing

<sup>a</sup> D748Y was created by re-targeting original clone using newly created PAM site inserted during initial unsuccessful targeting event

**G** – for single guide RNA (sgRNA) not beginning with Guanine, an extra G was added to facilitate efficient transcription from U6 promoter

**Red Base** – codon altering variant

**Green Base** – silent mutations

NA – Not Applicable

| <b>Cell Line</b> | <b>Forward Primer</b>       | <b>Reverse Primer</b>        |
|------------------|-----------------------------|------------------------------|
| <i>Class 1</i>   |                             |                              |
| T8M              | AGTAGCTAAAGTCACCAGCGTGC     | CATGTACTIONGATCACCCCCTGGG    |
| N127S            | AGCAGGAGAATCGATTGAACCC      | TGTCTCTGGCCATCAACTGC         |
| D167H            | CTTAGGCTTCTCCTGGCAATC       | CTTTCCTAGGCCTGGAATCTCC       |
| G322D            | CCTCTGTTTTTCATGGCGTAGTAAG   | GCCTCTCATGGATAAGAACAGAATAGAG |
| L390F            | CCCAGCAGATTCAAGCTTTT        | GGACAGCACATTGCCAAGTA         |
| <i>Class 3</i>   |                             |                              |
| T44M             | AGAAGCCGACCACCACAGT         | GTCGTGCCAGGCATTTTAAAT        |
| Y408C            | CCCAGCAGATTCAAGCTTTT        | GGACAGCACATTGCCAAGTA         |
| T441P            | CCTTTTGGATCAAATGATGCTT      | CCACTGTCCACAAAGGTGCT         |
| S516I            | GGTTTACCCAGAAAGCAGCTTTC     | CGACTTGCAAACCTGTTGGTA        |
| D603V            | ATGGGTTTTGAATTCCCAAATGG     | CACAAAGCCCCAAAACCAGGTT       |
| H639R            | TGTAAATTAGGAAATGGGTTTTGAA   | ACAAAACGTTACCCCCACAA         |
| G674A            | CTAGGCCACAGTCAAATTACAGG     | TTCCAACATTTTACGCCATGAACG     |
| A714V            | TATGTCAGTGTAACCTACGCG       | TATCTTCAAGGGACTAGGAGATGC     |
| S723F            | CAGTGTACAGTTTAGGACTAACAATCC | CAGATGTTTTTACATGAGAATCTGCAA  |
| D748Y            | GCCCTTGCCCATTTTTCTAT        | TTGGCCAAGGCAGTAAGTTC         |
| <i>Class 5</i>   |                             |                              |
| C199R            | TCAGTTTGAAGACATTCTCTTTGG    | TCACTAGACTCAATTTGCTTACCTG    |
| P349R            | TGTTCCCTCTGTTTTTCATGGCG     | AGTGGTATAATCATGTGGGTAAC      |
| P622L            | CAGGCTATGTAGAACCAATGCAG     | CCAGTAATGATGTGGAACATCTG      |
| C697R            | AGGCTGTGGTTCTGCCTTTA        | GGAGATGCACTTACCTGAGGA        |
| G751R            | GCCCTTGCCCATTTTTCTAT        | TTGGCCAAGGCAGTAAGTTC         |
| MSH2-KO          | AGTAGCTAAAGTCACCAGCGTGC     | CATGTACTIONGATCACCCCCTGGG    |

**Supp. Table S2 Primers Used to Amplify Target Region for Sequence Verification**

| Cell Line | Forward Primer          | Reverse Primer          | Expected Amplicon size (bp) |
|-----------|-------------------------|-------------------------|-----------------------------|
| C199R     | GAATCTGCAGAGTGTTGTGC    | CAGCACTATTCATCTGCTCTCC  | 551                         |
| D603V     | AATATGAAGAAGCCCAGGATGCC | CAGCCATGAACGTGGAGACTCC  | 477                         |
| C697R     | TGTTCCATATGTACGACCAGCC  | GTTGGTATCTGATTGGCCAAGGC | 540                         |

**Supp. Table S3 Primers Used to Amplify Target Region for cDNA amplification**

| Cell Line          | No. of homozygous clones obtained | No. of clones screened | Homozygous targeting efficiency (%) | Distance of codon-altering mutations from PAM | Distance of silent mutations from PAM |
|--------------------|-----------------------------------|------------------------|-------------------------------------|-----------------------------------------------|---------------------------------------|
| <i>Class 1</i>     |                                   |                        |                                     |                                               |                                       |
| T8M                | 5                                 | 24                     | 21 <sup>d</sup>                     | 9                                             | 2, 5, 7                               |
| N127S              | 2                                 | 24                     | 8 <sup>e</sup>                      | 4, 5                                          | 3, 6                                  |
| D167H              | 1                                 | 40                     | 2.5 <sup>d</sup>                    | PAM                                           | - <sup>f</sup>                        |
| G322D              | 1                                 | 7                      | 14 <sup>d</sup>                     | PAM                                           | -                                     |
| L390F              | 4                                 | 32                     | 13 <sup>d</sup>                     | 14                                            | 4, 7, 10, 11                          |
| <i>Class 3</i>     |                                   |                        |                                     |                                               |                                       |
| T44M               | 3                                 | 32                     | 9 <sup>e</sup>                      | 7                                             | 3, 9                                  |
| Y408C              | 2                                 | 16                     | 13 <sup>d</sup>                     | 3                                             | -                                     |
| T441P              | 5                                 | 53                     | 9 <sup>e</sup>                      | 4                                             | 1,5                                   |
| S516I              | 2                                 | 16                     | 13 <sup>d</sup>                     | 1                                             | -                                     |
| D603V <sup>a</sup> | 0                                 | 45                     | 0 <sup>e</sup>                      | 31                                            | 3, 4, 5, 6, 21                        |
| D603V <sup>b</sup> | 0 <sup>c</sup>                    | 94                     | 0 <sup>d</sup>                      | PAM                                           | -                                     |
| H639R              | 4                                 | 23                     | 17 <sup>e</sup>                     | 4                                             | PAM, 3, 5                             |
| G674A              | 1                                 | 22                     | 5 <sup>e</sup>                      | PAM                                           | 4 (3' of PAM)                         |
| A714V              | 3                                 | 11                     | 27 <sup>d</sup>                     | 1                                             | -                                     |
| S723F              | 2                                 | 35                     | 6 <sup>e</sup>                      | PAM                                           | 2                                     |
| D748Y              | 0 <sup>c</sup>                    | 23                     | 0 <sup>e</sup>                      | 14                                            | PAM, 2, 6, 8                          |
| <i>Class 5</i>     |                                   |                        |                                     |                                               |                                       |
| C199R              | 1                                 | 16                     | 6 <sup>d</sup>                      | 7                                             | -                                     |
| P349R              | 3                                 | 32                     | 9 <sup>d</sup>                      | PAM                                           | 3                                     |
| P622L              | 2                                 | 24                     | 8 <sup>d</sup>                      | 11                                            | 3, 6, 9                               |
| C697R              | 5                                 | 48                     | 10 <sup>e</sup>                     | 1                                             | PAM, 3                                |
| G751R              | 3                                 | 48                     | 6 <sup>d</sup>                      | PAM                                           | -                                     |

**Supp. Table S4 Targeting Efficiency and Relative Position of Target Codon to PAM Site**

<sup>a</sup> Initial attempt to target via an NGG PAM site failed to produce any targeted clones

<sup>b</sup> Targeting via an NGA PAM site

<sup>c</sup> Heterozygous clones were obtained that were re-targeted

<sup>d</sup> Determined by Sanger sequencing

<sup>e</sup> Determined by restriction enzyme digestion screening

<sup>f</sup> A single nucleotide silent mutation was introduced within the PAM

| Cell Line      | I | II | III | IV | V  |
|----------------|---|----|-----|----|----|
| <i>Class 1</i> |   |    |     |    |    |
| T8M            | ✓ | ✓  | ✓   | ✓  | ND |
| N127S          | ✓ | ✓  | ✓   | ✓  | ✓  |
| D167H          | ✓ | ✓  | ND  | ✓  | ✓  |
| G322D          | ✓ | ✓  | ✓   | ✓  | ✓  |
| L390F          | ✓ | ✓  | ✓   | ✓  | ✓  |
| <i>Class 3</i> |   |    |     |    |    |
| T44M           | ✓ | ✓  | ✓   | ✓  | ✓  |
| Y408C          | ✓ | ✓  | ✓   | ✓  | ✓  |
| T441P          | ✓ | ✓  | ✓   | ✓  | ✓  |
| S516I          | ✓ | ✓  | ✓   | ✓  | ND |
| D603V          | ✓ | ✓  | ✓   | ✓  | ✓  |
| H639R          | ✓ | ✓  | ✓   | ✓  | ✓  |
| G674A          | ✓ | ✓  | ✓   | ✓  | ✓  |
| A714V          | ✓ | ✓  | ✓   | ✓  | ✓  |
| S723F          | ✓ | ✓  | ✓   | ✓  | ✓  |
| D748Y          | ✓ | ✓  | ✓   | ✓  | ✓  |
| <i>Class 5</i> |   |    |     |    |    |
| C199R          | ✓ | ✓  | ✓   | ✓  | ✓  |
| P349R          | ✓ | ✓  | ✓   | ✓  | ✓  |
| P622L          | ✓ | ✓  | ✓   | ✓  | ✓  |
| C697R          | ✓ | ✓  | ND  | ✓  | ✓  |
| G751R          | ✓ | ✓  | ✓   | ✓  | ✓  |

**Supp. Table S5 Examination of Top Five Candidate Loci for Off-target Cleavage by CRISPR-Cas9**

✓ - Sequence at candidate off-target site matches expected H1 WT sequence

ND - Sites could not be amplified due to presence of repetitive sequences

| <b>Cell Line</b> | <b>BAT-26<sup>a</sup></b> | <b>NR-21<sup>a</sup></b> | <b>BAT-25<sup>a</sup></b> | <b>MONO-27<sup>a</sup></b> | <b>NR-24<sup>a</sup></b> | <b>Penta D<sup>a</sup></b> | <b>Penta E<sup>a</sup></b> |
|------------------|---------------------------|--------------------------|---------------------------|----------------------------|--------------------------|----------------------------|----------------------------|
| H1 (WT)          | 0/1                       | 0/1                      | 0/1                       | 0/1                        | 0/1                      | 0/1                        | 0/1                        |
| MSH2-KO          | 1/1                       | 1/1                      | 1/1                       | 1/1                        | 1/1                      | 0/1                        | 1/1                        |
| H639R            | 0/12                      | 0/12                     | 1/12                      | 0/12                       | 0/12                     | 0/12                       | 0/12                       |

**Supp. Table S6 Microsatellite Instability with Expanded Five Mononucleotide Marker Panel**

<sup>a</sup> Number of clones with altered alleles compared to WT sequence
